# Supplementary material
Source: publisher figshare collection journal article supplement (https://karger.figshare.com/ndownloader/files/25818614)
Supplement: Supplementary file 1 [file 25818614]

**Table S4**. Analysis of reciprocal relationships between the LTPs studied. level (two-tailed). *: The correlation is significant at the 0.05 level (two-tailed).

*Notes*: Pearson’s correlation coefficient values are shown for paired molecular allergens. A correlation coefficient of 0.7 to 1 indicates a strong positive association (**bold**), and of 0.3 to 0.7 a moderate positive association. **: The correlation is significant at the 0.01 level (two-tailed).
